# Supplementary material for: Can Vascular Endothelial Growth Factor and Microvessel Density Be Used as Prognostic Biomarkers for Colorectal Cancer? A Systematic Review and Meta-Analysis
Source: PubMed Central journal article supplement (PMC3985294; doi:10.1155/2014/102736), 2014-03-27
Supplement: 102736.f1.pdf [file 102736.f1.pdf]

## Online Resource 1 Quality assessment questionnaire

### 1. Research Design

#### 1) Definition of Study Objectives

a) Patient selection criteria, including histological type, disease stage, and primary or advanced: defined (1 point) or not defined (0 points).

b) Number of non-assessable samples with exclusion causes: defined (1 point) or not defined (0 points).

c) Whether patients had received chemotherapy or radiotherapy before surgery: defined (1 point) or not defined (0 points).

d) Description of treatment status after surgery: defined (1 point) or not defined (0 points).

2) Study design: prospective (2 points), retrospective (1 point), or not defined (0 points).

3) Statistical methods and test descriptions: defined (1 point) or not defined (0 points).

### 2. Laboratory Methodology

1) Observers blinded to the clinicopathological data: blind (1 point) or unblinded or not defined (0 points).

2) Test reproducibility control including 2 or more investigators testing the samples: defined (1 point) or not defined or fewer than 2 investigators (0 points).

3) Detailed description of the tests:

a) Experimental method: defined (1 point) or not defined (0 points).

b) The type of antibodies/antigens: defined (1 point) or not defined (0 points).

c) Coloration and reading methods: defined (1 point) or not defined (0 points).

4) Description of the negative or positive control procedures: defined (1 point) or not defined (0 points).

5) Definition of the level of positivity or negativity of the test (or cut-off value): defined (1 point) or not defined (0 points).

### 3. Analysis of the Results

1) The range or median of follow-up: both (2 points), either (1 point), or none (0 points).

2) Follow-up description: the percentage of loss to follow-up >20% or unknown (0 points), 5-20% (1 point), or <5% (2 points).

3) Survival analysis of the prognostic factors for survival: report of the multivariate analysis of hazard ratios and their confidence intervals (2 points), univariate analysis of the prognostic factors for survival or multivariate analysis results without evaluation of the hazard ratios and confidence intervals (1 point), or not reported or inadequate (0 points).

Online Resource 2 Main Characteristics of The Studies Including in The Analysis on Association Between VEGF and Survival of Colorectal Cancer Patients

| Authors/<br>Year of<br>publication | Country | Sample<br>(C/R) | size | TNM            | No. of<br>positive<br>VEGF | Median<br>months of<br>follow-up | HR (95%CI)                          | Survival<br>analysis | Quality<br>score <sup>1</sup> | Adjusted variable in<br>Cox analysis                                                                                                                                                     |
|------------------------------------|---------|-----------------|------|----------------|----------------------------|----------------------------------|-------------------------------------|----------------------|-------------------------------|------------------------------------------------------------------------------------------------------------------------------------------------------------------------------------------|
| Zhou et al<br>2011                 | China   | 141<br>(61/80)  |      | M <sup>2</sup> | 99                         | 59                               | 3.39(1.00-11.36) <sup>3</sup>       | DFS                  | aab                           | diabetes, lymph nodes metastasis,<br>COX-2,MMP-2, CEA                                                                                                                                    |
| Kwon et al<br>2010                 | Korea   | 132             |      | M              | 30                         | 19.25                            | 4.78(1.15-19.94)<br>1.28(0.41-4.03) | OS<br>DFS            | bca                           | age, tumor size, tumor depth, IL6,<br>CRP, CEA,<br>differentiation, lymph nodal<br>metastasis, lymphocytic<br>infiltration, depth of invasion,<br>distant metastasis, TNM, SPARC,<br>MVD |
| Liang et al<br>2010                | China   | 114<br>(114/0)  |      | M              | 56                         | 53                               | 0.73(0.54-0.99)<br>0.79(0.54-1.14)  | OS<br>DFS            | bab                           |                                                                                                                                                                                          |
| Barresi et al<br>2010              | Italy   | 52              |      | L <sup>4</sup> | 25                         | -                                | 2.58(1.07-6.22) <sup>3</sup>        | OS                   | bac                           | age, MVD                                                                                                                                                                                 |
| Hong et al<br>2009                 | Korea   | 31<br>(19/12)   |      | A <sup>5</sup> | -                          | 17.6 <sup>6</sup>                | 1.66(0.48-5.77)<br>1.54(0.72-3.30)  | OS<br>DFS            | bab                           | CA9                                                                                                                                                                                      |
| Cao et al<br>2009                  | China   | 71              |      | M              | 40                         | -                                | 1.13(0.41-3.09)                     | OS                   | bac                           | HIF-1 $\alpha$                                                                                                                                                                           |
| Toiyama et al<br>2009              | Japan   | 40<br>(0/40)    |      | M              | -                          | 41                               | 30.25(1.72-529.68)                  | OS                   | bba                           | lymph node metastasis                                                                                                                                                                    |
| Alabi et al<br>2009                | UK      | 93<br>(53/40)   |      | M              | 10                         | 54                               | 7.17(1.55-33.1)                     | DFS                  | bcb                           | TNM                                                                                                                                                                                      |
| Wei et al<br>2009                  | Taiwan  | 86<br>(57/29)   |      | M              | -                          | 36                               | 0.85(0.27-2.75)                     | OS                   | bba                           | age, sex, tumor location, TNM,<br>CEA, PIGF, sFLT-1                                                                                                                                      |
| Miyazaki et al<br>2008             | Japan   | 127<br>(74/53)  |      | M              | 63                         | 44                               | 1.91(1.06-3.50)<br>1.99(1.00-3.96)  | OS<br>DFS            | bcb                           | duck's stage                                                                                                                                                                             |
| Zafirellis et al<br>2008           | Greece  | 117<br>(78/39)  |      | M              | 49                         | 64                               | 3.50(1.90-6.50)                     | DFS                  | aab                           | age, TNM                                                                                                                                                                                 |
| Giralt et al<br>2006               | Spain   | 81<br>(0/81)    |      | A              | 43                         | 53                               | 1.98(0.81-4.80)                     | DFS                  | aab                           | pathological stage                                                                                                                                                                       |

|                        |       |                |   |    |                   |                                      |           |     |                                                                                                              |
|------------------------|-------|----------------|---|----|-------------------|--------------------------------------|-----------|-----|--------------------------------------------------------------------------------------------------------------|
| Ferroni et al<br>2005  | Italy | 69<br>(45/24)  | M | 27 | 76.3              | 5.15(1.10-24.10)                     | OS        | aba | duck's stage                                                                                                 |
| Boxer et al<br>2005    | UK    | 56<br>(37/19)  | L | 12 | 79                | 4.23(1.12-15.98) <sup>3</sup>        | OS        | bbb | sex, age, duke's stage, location                                                                             |
| Kojima et al<br>2005   | Japan | 65             | M | 24 | -                 | 2.31(0.61-8.78)                      | OS        | bab | morphometric parameters of tumor, lymphatic invasion                                                         |
| Tamura et al<br>2004   | Japan | 49<br>(26/23)  | M | 21 | 102 <sup>6</sup>  | 3.20(1.41-7.29)                      | OS        | cab | No. of pulmonary metastases, duke's stage, CEA                                                               |
| Kaio et al<br>2003     | Japan | 152            | M | 40 | 61.2 <sup>6</sup> | 7.73(1.15-51.84)                     | OS        | bab | lymph node metastasis, lymph and venous invasion, PD-ECGF, MVD, se(a2)-si(ai), histological, differentiation |
| Khorana et al<br>2003  | USA   | 131<br>(131/0) | M | 45 | 60                | 0.57(0.34-0.95)                      | OS        | baa | age, adjuvant chemotherapy, AJCC's stage, EGFR                                                               |
| White et al<br>2002    | UK    | 84<br>(62/22)  | M | 62 | 69.3              | 3.81(1.09-13.36)<br>4.13(1.18-14.46) | OS<br>DFS | bab | duck's stage, venous invasion                                                                                |
| Ishigami et al<br>1999 | Japan | 60<br>(31/29)  | M | 11 | 30.1              | 1.94(1.23-3.06)                      | OS        | bcb | depth of tumour infiltration, maximum diameter, tumour differentiation                                       |

Footnotes: <sup>1</sup>Quality score present research design, lab method and statistical analysis respectively; <sup>2</sup>M means studies focus on patients of all stages(mixed); <sup>3</sup>Data extrapolated; <sup>4</sup>L means studies focus on limited forms (TNM I/II); <sup>5</sup>A means studies focus on advanced forms (TNM III/IV); <sup>6</sup>Mean months of follow-up.

Abbreviations: C, colon; CI, confidence interval; CA9, carbonic anhydrase 9; CEA, carcinoembryonic antigen; COX-2, cyclooxygenase-2; CRP, C-reactive protein; DFS, disease free survival; HIF-1 $\alpha$ , hypoxia-inducible factor 1 alpha; EGFR, epidermal growth factor receptor; HR, hazard ratio; IL-6, interleukin-6; OS, overall survival; PD-ECGF, platelet-derived growth factor; PIGF, placenta growth factor; R, rectum; sFLT-1, soluble secreted form of Flt-1; SPARC, secreted protein, acidic and rich in cysteine; VEGF, vascular endothelial growth factor.

Online Resource 3 Main Characteristics of The Studies Including in The Analysis on The Association Between MVD and Survival of Colorectal Cancer Patients

| Authors<br>Year of<br>publication | Country  | Study<br>(C/R) | size | TNM            | No. of<br>MVD<br>positive | Median<br>months of<br>follow-up | HR(95%CI)                    | Survival<br>analysis | Quality<br>score <sup>1</sup> | Adjusted variable in<br>Cox analysis                                                                                                                     |
|-----------------------------------|----------|----------------|------|----------------|---------------------------|----------------------------------|------------------------------|----------------------|-------------------------------|----------------------------------------------------------------------------------------------------------------------------------------------------------|
| Moreira<br>et al 2011             | Brazil   | 60             |      | M <sup>2</sup> | -                         | 64.08                            | 3.36(1.10-11.2)              | OS                   | caa                           | TNM                                                                                                                                                      |
| Barresi<br>et al 2010             | Italy    | 52             |      | L <sup>3</sup> | 26                        | -                                | 2.15(0.88-5.22) <sup>5</sup> | OS                   | bac                           | age, VEGF                                                                                                                                                |
| Nanashima<br>et al 2009           | Japan    | 139<br>(75/64) |      | A <sup>4</sup> | -                         | 52                               | 2.71(1.15-6.42)              | OS                   | baa                           | No. of tumor, node metastasis,<br>CEA, classification, distribution of<br>tumor,surgical margin, fibrous<br>pseudocapsular formation,<br>differentiation |
| Yodavudh<br>et al 2008            | Thailand | 119<br>(72/47) |      | M              | -                         | -                                | 1.94(1.05-3.61)              | OS                   | aab                           | differentiation, lymphatic vascular<br>and perineural invasion, depth of<br>invasion, distance metastasis,<br>TNM                                        |
| Rajaganeshan<br>et al 2007        | UK       | 109            |      | A              | 39                        | 33                               | 1.10(1.03-1.18)              | OS                   | baa                           | increasing size of the metastases,<br>positive resection margin                                                                                          |
| Gulubova<br>et al 2006            | Bulgaria | 106<br>(57/49) |      | M              | 54                        | 32.2 <sup>6</sup>                | 3.70(1.73-7.87)              | OS                   | baa                           | age, histological,inflammatory<br>infiltration, invasion in lymph<br>vessels                                                                             |
| Romani<br>et al 2006              | Italy    | 125            |      | M              | 47                        | 70.8                             | 1.42(1.25, 1.60)             | OS                   | bab                           | none                                                                                                                                                     |
| Chung<br>et al 2006               | China    | 101            |      | A              | -                         | 36.3                             | 1.02(0.97, 1.07)             | OS                   | abb                           | angiopoietin-1,angiopoietin-<br>2,lymphatic invasion, invasion of<br>venous and perineural,<br>pathological stage                                        |
| Jubb<br>et al 2006                | USA      | 278            |      | M              | -                         | -                                | 1.00(0.87-1.15)              | OS                   | aaa                           | unknow                                                                                                                                                   |
| Boxer<br>et al 2005               | UK       | 56<br>(37/19)  |      | L              | 27                        | 79                               | 0.31(0.08-1.15)              | OS                   | bbb                           | dukes' stage, sex, age, location                                                                                                                         |
| Hasebe                            | Japan    | 157            |      | L              | -                         | 62                               | 3.40(1.50-7.50) <sup>7</sup> | OS                   | baa                           | fibroblast MIB-1 labeling index,                                                                                                                         |

|                        |             |                 |   |    |    |                              |    |     |                                                                                                                                           |
|------------------------|-------------|-----------------|---|----|----|------------------------------|----|-----|-------------------------------------------------------------------------------------------------------------------------------------------|
| et al 2003             |             |                 | A |    |    | 5.30(1.70-5.37) <sup>7</sup> | OS |     | dukes stage, vascular invasion                                                                                                            |
| Miyagawa et al 2002    | Netherlands | 71              | A | 38 | 28 | 2.46(1.13-5.37)              | OS | bab | differentiation, area of liver macrophage                                                                                                 |
| Cianchi et al 2002     | Italy       | 84              | L | 43 | 67 | 0.89(0.30-2.63)              | OS | baa | age, gender, histology, differentiation, depth of invasion, invasive margin, lymphocytic infiltration, venous invasion                    |
| Vermeulen et al 1999   | Belgium     | 116             | M | 59 | 30 | 3.26(1.41-7.55)              | OS | aaa | age, tumor site, depth and size, histology, lymphatic invasion, lymph node metastasis, p53                                                |
| Sternfeld et al 1999   | German      | 146             | M | 61 | -  | 2.31(1.33-4.00)              | OS | bab | grade, angiosis, lymphangiosis, depth of penetration                                                                                      |
| Tanigawa et al 1997    | Japan       | 133             | M | 66 | 72 | 3.39(1.80-6.40)              | OS | baa | age, gender, tumor gross appearance, tumor site, tumor size, histology, tumor depth, lymphatic and vessel invasion, lymph node metastasis |
| Takebayashi et al 1996 | Japan       | 163<br>(58/105) | M | -  | 92 | 1.04(0.98, 1.10)             | OS | baa | dukes' stage, dThdPase                                                                                                                    |

Footnotes: <sup>1</sup>Quality score present research design, lab method and statistical analysis respectively; <sup>2</sup>M means studies focus on patients of all stages(mixed); <sup>3</sup>L means studies focus on limited forms (TNM I/II); <sup>4</sup>A means studies focus on advanced forms (TNM III/IV); <sup>5</sup>Data extrapolated. <sup>6</sup>Mean months of follow-up; <sup>7</sup>Both data used in analysis.

Abbreviations: C, colon; CI confidence interval; DFS, disease free survival; dThdPase, thymidine phosphorylase; HR, hazard ratio ; MVD, microvessel density; OS , overall survival; R, rectum.

Online Resource 4 The Cut-Off Value of VEGF and MVD in Each Study

| VEGF studies          | Category  | Cut-off value    | MVD studies             | Category       | Cut-off value                |
|-----------------------|-----------|------------------|-------------------------|----------------|------------------------------|
| Zhou et al 2011       | -         | -                | Moreira et al 2011      | Median         | 37                           |
| Kwon et al 2010       | Arbitrary | 825pg/ml         | Barresi et al 2010      | Median         | 28.25 vessel/mm <sup>2</sup> |
| Liang et al 2010      | Arbitrary | 25%              | Nanashima et al 2009    | Median         | 238/mm <sup>2</sup>          |
| Barresi et al 2010    | Arbitrary | Score>50         | Yodavudh et al 2008     | Median         | 20.5 vessel/HPF              |
| Hong et al 2009       | Arbitrary | Score>=80        | Rajaganeshan et al 2007 | - <sup>1</sup> | -                            |
| Cao et al 2009        | Arbitrary | Score>=2         | Gulubova et al 2006     | Mean           | 58.64 vessel/mm <sup>2</sup> |
| Toiyama et al 2009    | -         | -                | Romani et al 2006       | Arbitrary      | 21                           |
| Alabi et al 2009      | Arbitrary | 575pg/ml         | Chung et al 2006        | -              | -                            |
| Wei et al 2009        | Median    | 79.7pg/ml        | Jubb et al 2006         | -              | -                            |
| Miyazaki et al 2008   | Median    | 1840pg/ml        | Boxer et al 2005        | -              | -                            |
| Zafirellis et al 2008 | Arbitrary | 75               | Hasebe et al 2003       | -              | -                            |
| Giralt et al 2006     | Arbitrary | Score>=4         | Miyagawa et al 2002     | Arbitrary      | 50                           |
| Ferroni et al 2005    | Arbitrary | 215pg/ml         | Cianchi et al 2002      | Median         | 45                           |
| Boxer et al 2005      | Arbitrary | Score>=1         | Vermeulen et al 1999    | Median         | 75                           |
| Kojima et al 2005     | Arbitrary | 20%              | Sternfeld et al 1999    | Mean           | 75                           |
| Tamura et al 2004     | Arbitrary | 50%              | Tanigawa et al 1997     | Median         | 105                          |
| Kaio et al 2003       | Arbitrary | 10%              | Takebayashi et al 1996  | -              | -                            |
| Khorana et al 2003    | Arbitrary | 2%               |                         |                |                              |
| White et al 2002      | Arbitrary | Score>=2         |                         |                |                              |
| Ishigami et al 1999   | Arbitrary | 4.8 <sup>2</sup> |                         |                |                              |

Footnotes: <sup>1</sup>no analysis; <sup>2</sup>VEGF T/N ratio.
